# Supplementary material for: Preparation and assembly of concave polymer microparticles
Source: Royal Society of Chemistry journal article supplement (doi:10.1039/c5ra04110d), 2015-01-01
Supplement: c5ra04110d1.pdf [file c5ra04110d1.pdf]

### Supporting Information

Table S1. Preparation of PS and PMMA by solution polymerizations.

|                   | styrene,<br>g | methyl<br>methacrylate,<br>g | THF,<br>g | AIBN,<br>mg | $M_w^c$ ,<br>$\times 10^4$ g/mol | $M_w/M_n^d$ |
|-------------------|---------------|------------------------------|-----------|-------------|----------------------------------|-------------|
| PS <sup>a</sup>   | 17.82         |                              | 55.28     | 90.4        | 3.8                              | 1.255       |
| PMMA <sup>b</sup> |               | 44.54                        | 135.03    | 222.0       | 3.5                              | 1.015       |

<sup>a</sup> 70°C, 21h, Ar.

<sup>b</sup> 65°C, 21h, Ar.

<sup>c</sup> Weight-average molecular weight, measured by gel permeation chromatography.

<sup>d</sup> Number-average molecular weight, measured by gel permeation chromatography.

THF: tetrahydrofuran; AIBN: 2,2'-Azobis(2-methylpropionitrile).

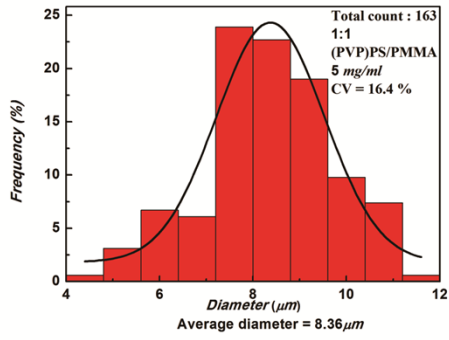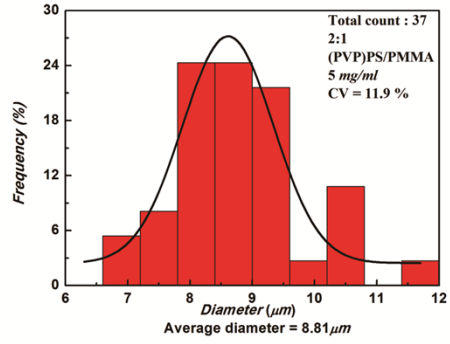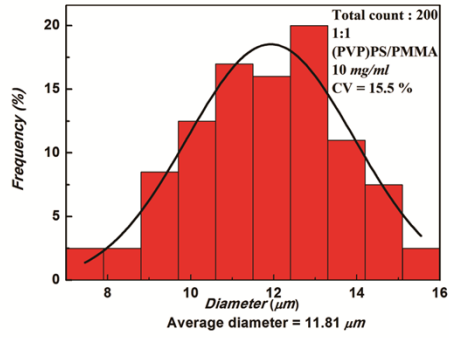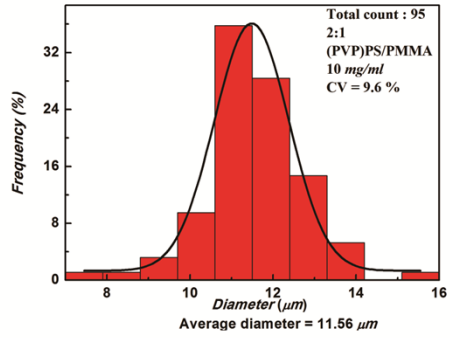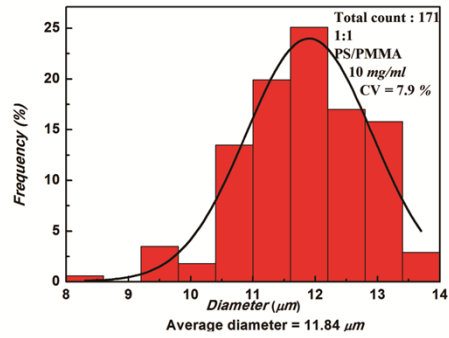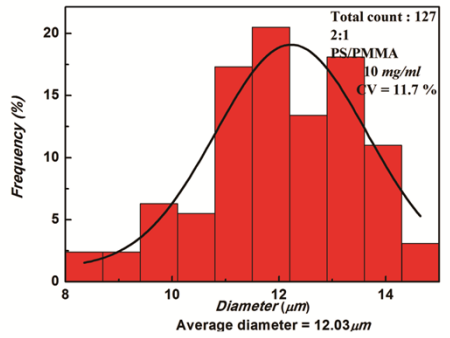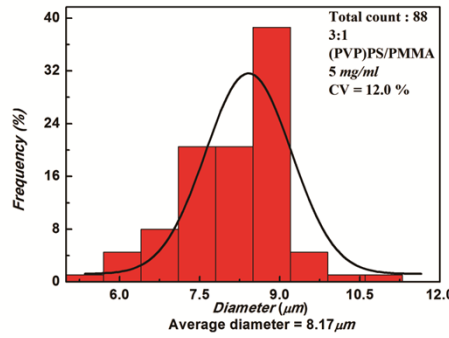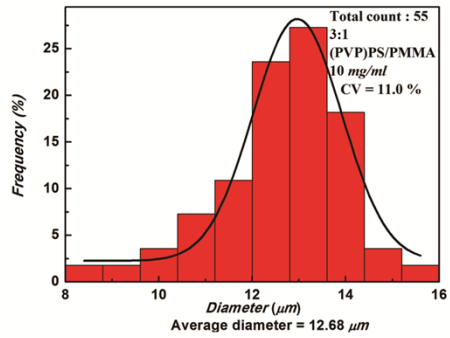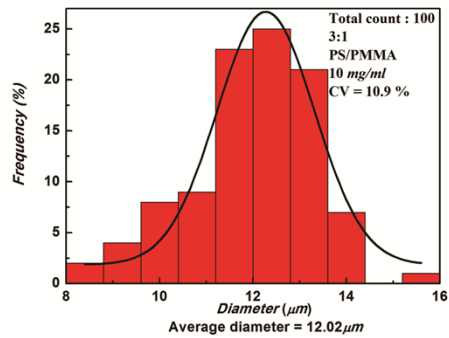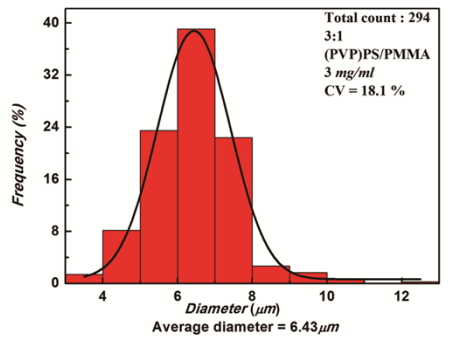

**Fig. S1.** Corresponding particle size distribution of PS/PMMA and (PVP)PS/PMMA Janus particles with different concentrations and components of disperse phases in microfluidics in Fig. 3. The black curves are the fits to the data using a Gaussian distribution. For the concentration  $3\text{mg/ml}$ , statistical error is very large due to poor particle size distribution; thus, the corresponding size distribution was not displayed for weight ratios 2:1 PS/PMMA and 1:1 PS/PMMA.
